# Supplementary material
Source: PubMed Central journal article supplement (PMC6688490)
Supplement: NIHMS1032610-supplement-Supplemental_Table.pdf [file NIHMS1032610-supplement-Supplemental_Table.pdf]

**Supplementary table 1. Nucleotide and amino acid Sequence of the Cetux scFv**

|                                                             |                                                                                                                                                                                                                                                                                                                                                                                                                                                                                                                                                                                                                                                                                                                                                                                                                                                                   |
|-------------------------------------------------------------|-------------------------------------------------------------------------------------------------------------------------------------------------------------------------------------------------------------------------------------------------------------------------------------------------------------------------------------------------------------------------------------------------------------------------------------------------------------------------------------------------------------------------------------------------------------------------------------------------------------------------------------------------------------------------------------------------------------------------------------------------------------------------------------------------------------------------------------------------------------------|
| <p>Cetux scFv<br/>Nucleotide<br/>Sequence:</p>              | <p>GGATCCGATATCCTCCTGACACAGTCCCCGGTGATTCTGTCCGTCTC<br/> GCCCCGAGAGAGGGTGCCTTCTCCTGCCGCGGTCTCAGTCGATCG<br/> GCACCAACATCCACTGGTACCAGCAGAGGACCAACGGCTCCCCTCG<br/> GCTGCTCATCAAGTACGCTCGGAATCTATCTCCGGCATTCCATCCC<br/> GTTTCAGTGGCAGCGGGTCAGGCACAGATTTACCTTGTCGATTAAT<br/> TCGGTAGAATCAGAGGACATCGCGGACTACTACTGCCAGCAGAACA<br/> ATAACTGGCCGACCACCTTTGGCGCAGGAACCAAGCTCGAGCTGAA<br/> GCGGGGAGGGGGTGGGAGTGGGGGTGGCGGCTCCGGGGGCGGCGG<br/> CTCACAGGTGCAACTGAAGCAGTCAGGCCCTGGCTTAGTCCAGCCCT<br/> CGCAAAGTCTCTCGATTACCTGCACTGTCTCCGGCTTCTCCCTCACCA<br/> ACTACGGGGTACACTGGGTACAGGCAGAGTCCTGGCAAGGGACTGGA<br/> GTGGCTGGGGGTAATCTGGAGCGGCGGCAACACCGACTACAATACC<br/> CCTTTCACATCCCGTCTAAGTATCAATAAGGACAACCTCGAAGTCGCA<br/> GGTGTCTTTAAGATGAACAGTCTGCAATCCAACGACACCGCGATCT<br/> ACTACTGCGCCCCGGGCCCTCACCTATTACGACTACGAGTTCGCTTAC<br/> TGGGGCCAGGGGACCCTGGTGACCGTGTCCGCCTCCGGA</p> |
| <p>Cetux scFv<br/>amino acid<br/>sequence<br/>Sequence:</p> | <p>GS DILLTQSPVILSVSPGERVSFSCRASQSIGTNIHWYQRTNGSPRLLIK<br/> YASESISGIPSRFSGSGSGTDFTLINSVESEDIADYYCQNNNWPTTFGA<br/> GTKLELKRGGGGSGGGGSGGGGSQVQLKQSGPGLVQPSQSLTCTVS<br/> GFSLTNYGVHWVRQSPGKLEWLGVIWSSGNTDYNTPFTSRLSINKDN<br/> SKSQVFFKMNSLQSNDAIYYCARALTYDYEFAYWGQGLVTVSASG</p>                                                                                                                                                                                                                                                                                                                                                                                                                                                                                                                                                                                     |

Variable light chain; linker; variable heavy chain
